# Supplementary material
Source: PubMed Central journal article supplement (PMC8339182)
Supplement: 13205_2021_2930_MOESM4_ESM.pdf [file 13205_2021_2930_MOESM4_ESM.pdf]

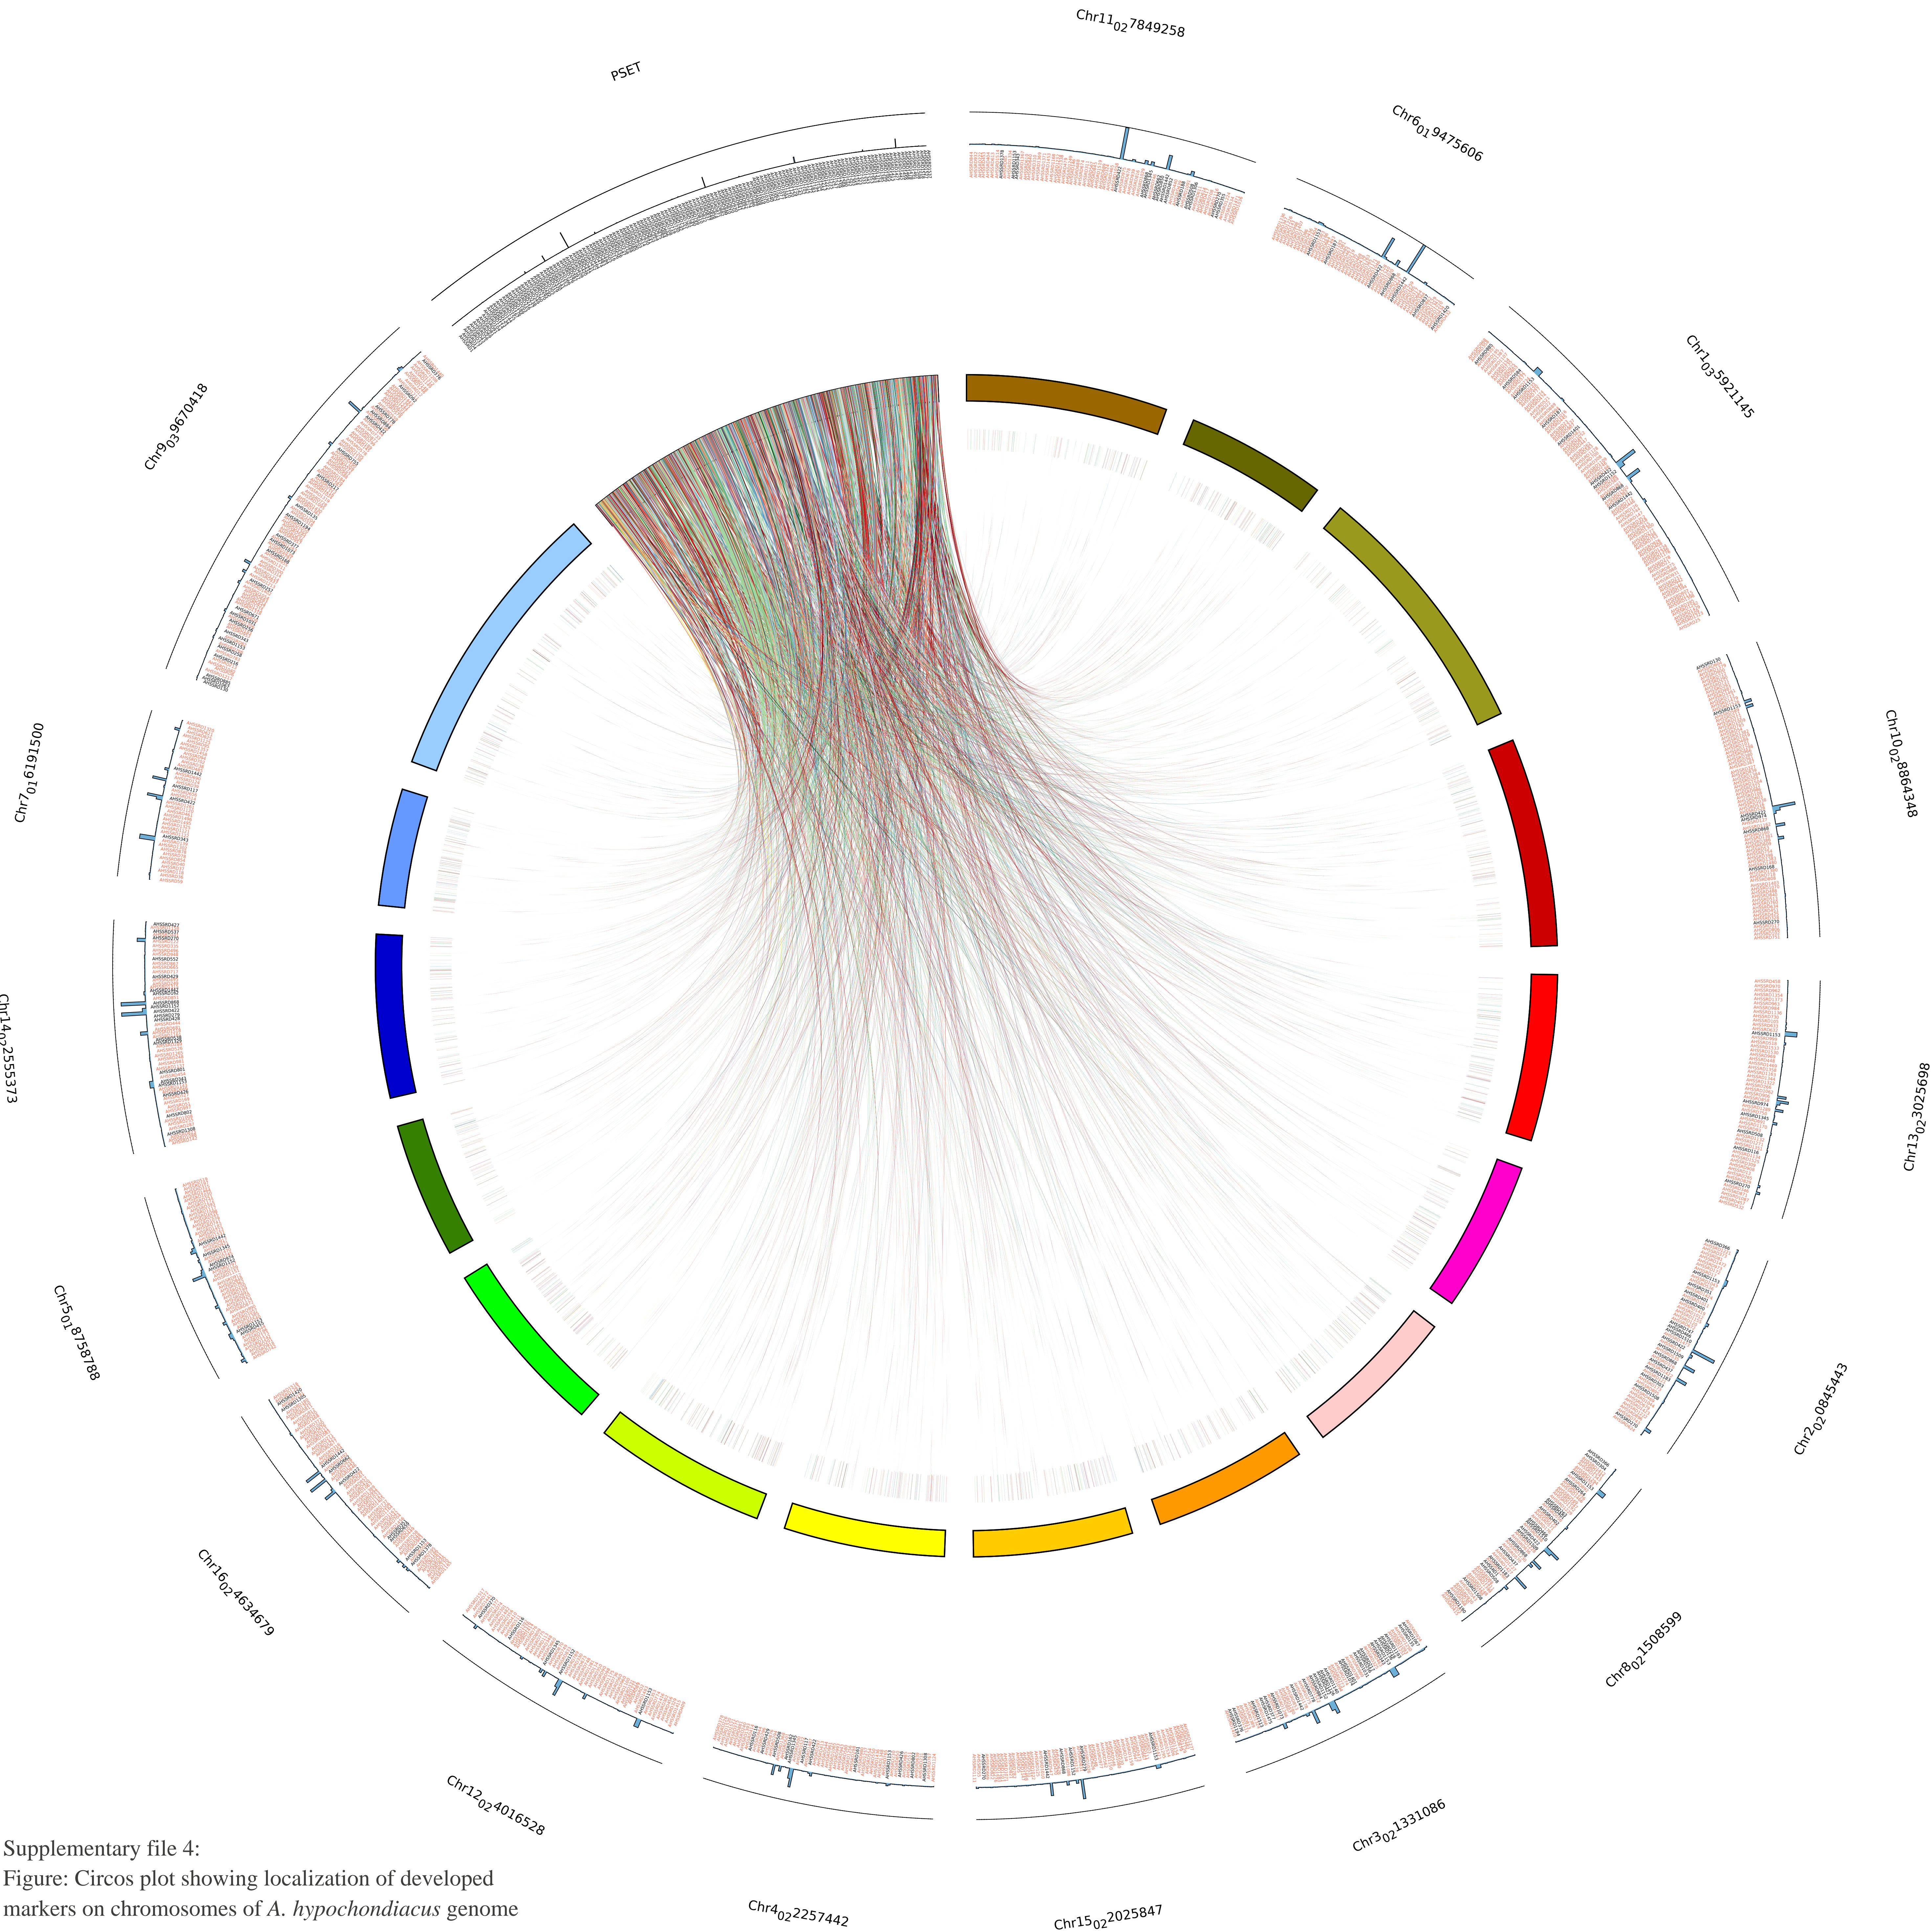

Supplementary file 4:  
 Figure: Circos plot showing localization of developed markers on chromosomes of *A. hypochondiacus* genome
