# Supplementary material
Source: PubMed Central journal article supplement (PMC8339182)
Supplement: 13205_2021_2930_MOESM6_ESM.pdf [file 13205_2021_2930_MOESM6_ESM.pdf]

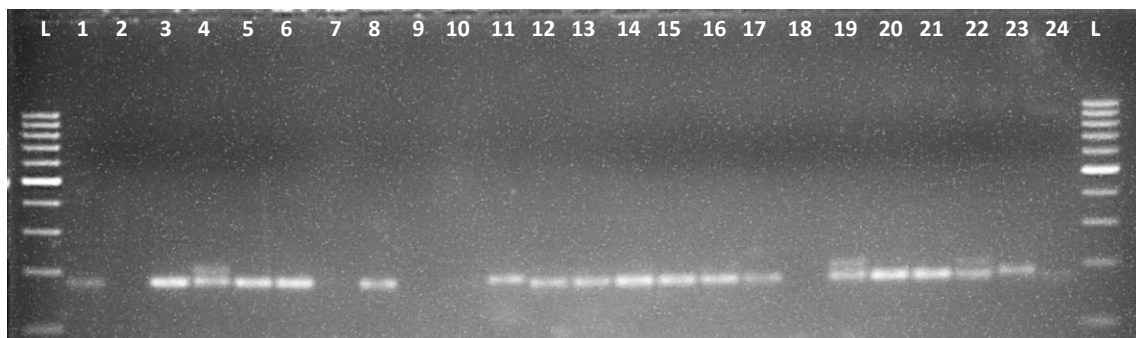

AH-SSR-V-13

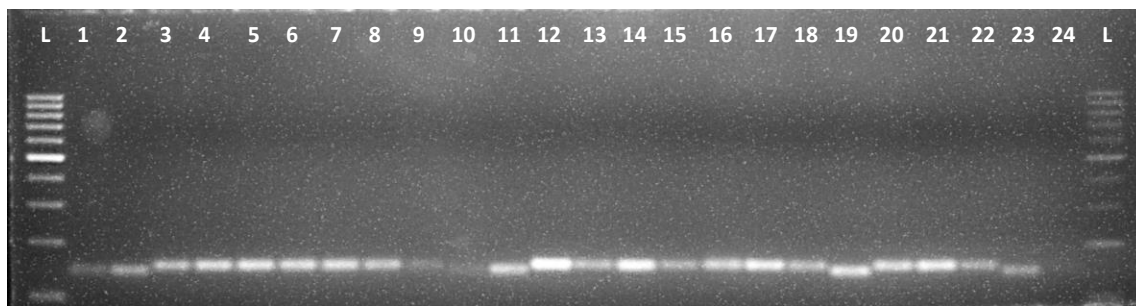

AH-SSR-V-14

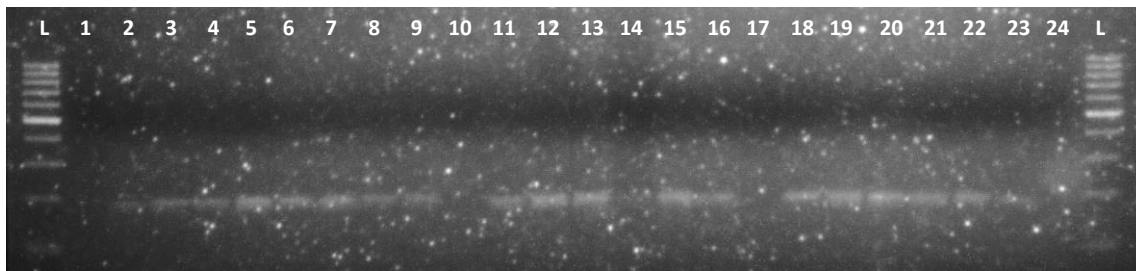

AH-SSR-V-16

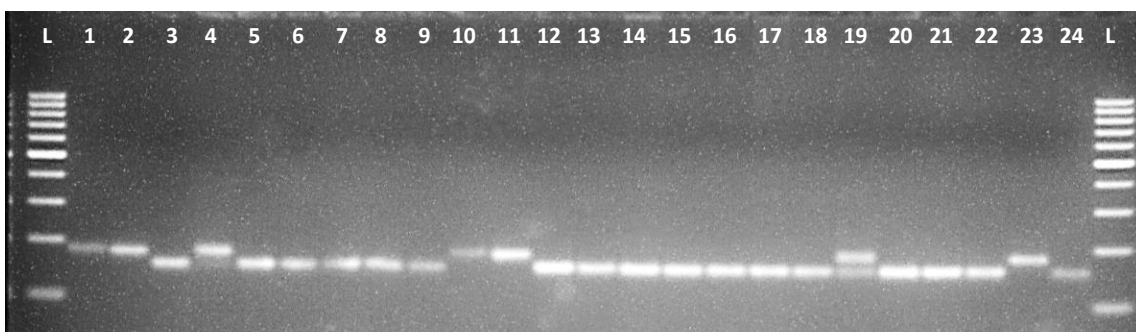

AH-SSR-V-26

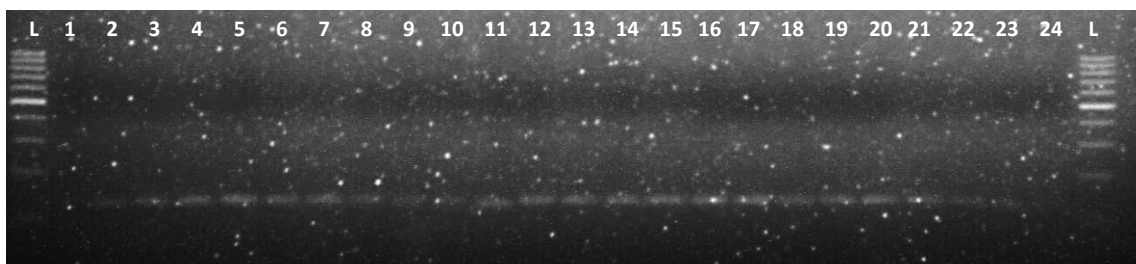

AH-SSR-V-28

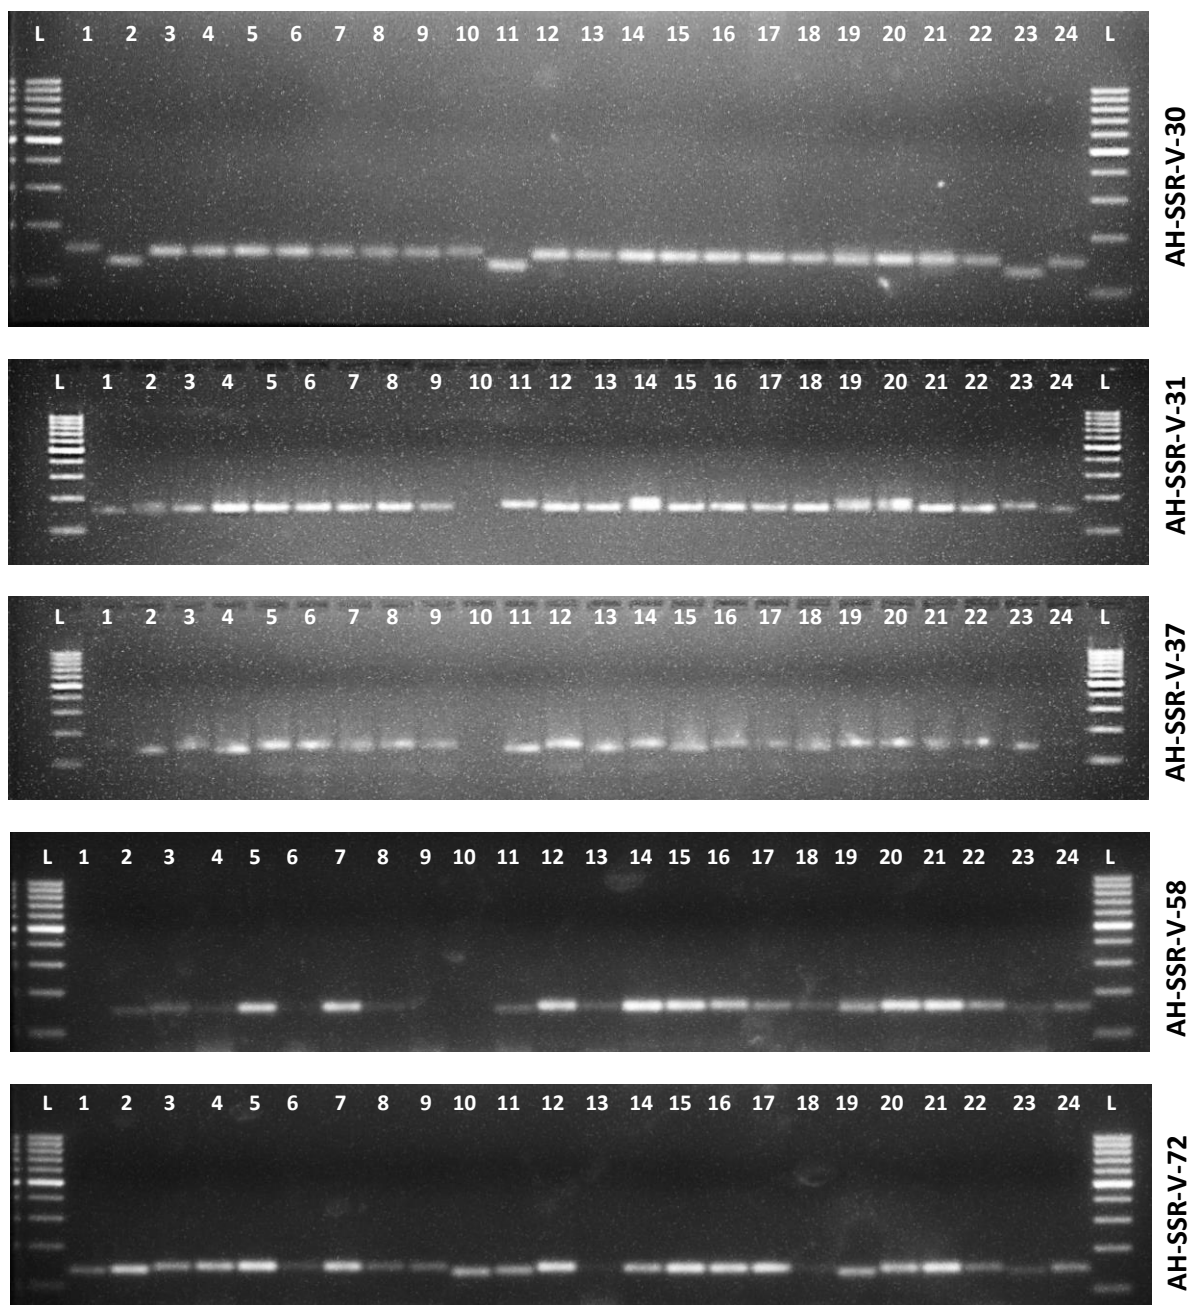

**Supplementary File 6: Agarose gel images of 10 primers used for validation in *A. hypochondriacus* population (24 genotypes)**

| Code | Genotype name        | Code | Genotype name | Code | Genotype name |
|------|----------------------|------|---------------|------|---------------|
| 1    | LC-2                 | 9    | PRA-2         | 17   | GA-1          |
| 2    | LC-43                | 10   | PRA-3         | 18   | BGA-49        |
| 3    | LC-53                | 11   | VL-44         | 19   | KBGA-5        |
| 4    | LC-56                | 12   | SKNA-903      | 20   | SKNA-1501     |
| 5    | IC-37313             | 13   | GA-3          | 21   | SKNA-1511     |
| 6    | IC-38191             | 14   | RMA-7         | 22   | SKGPA-37      |
| 7    | Durga-Green          | 15   | BGA-7         | 23   | SKGPA-32      |
| 8    | Selection from Durga | 16   | SKNA-40       | 24   | SKGPA-9       |

L: 100 bp DNA ladder; LC: Local Collection
