# Supplementary material
Source: PubMed Central journal article supplement (PMC8339182)
Supplement: 13205_2021_2930_MOESM7_ESM.pdf [file 13205_2021_2930_MOESM7_ESM.pdf]

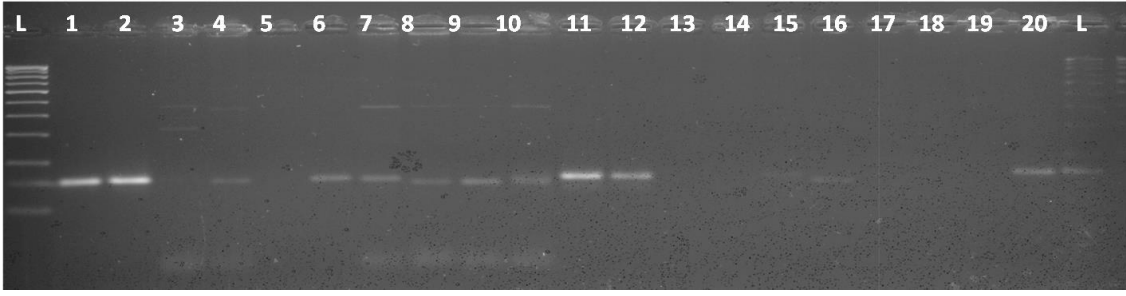

AH-SSR-V-12

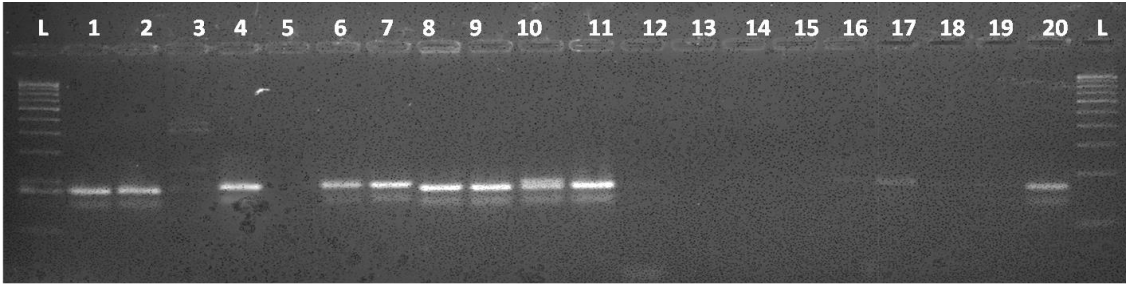

AH-SSR-V-13

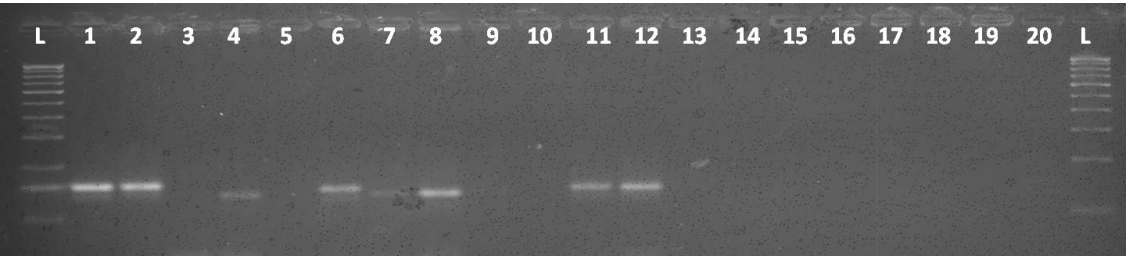

AH-SSR-V-14

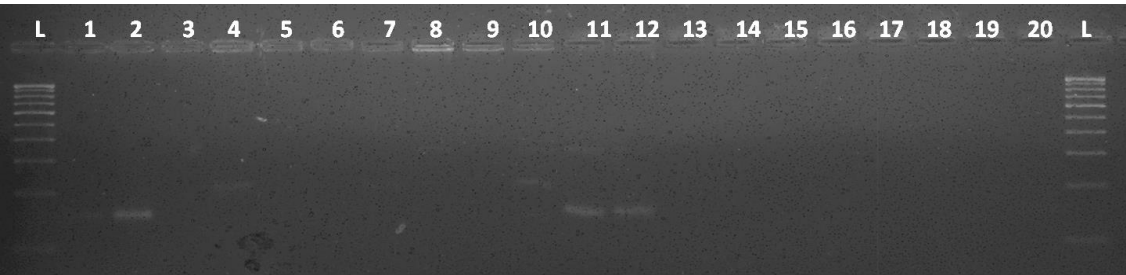

AH-SSR-V-20

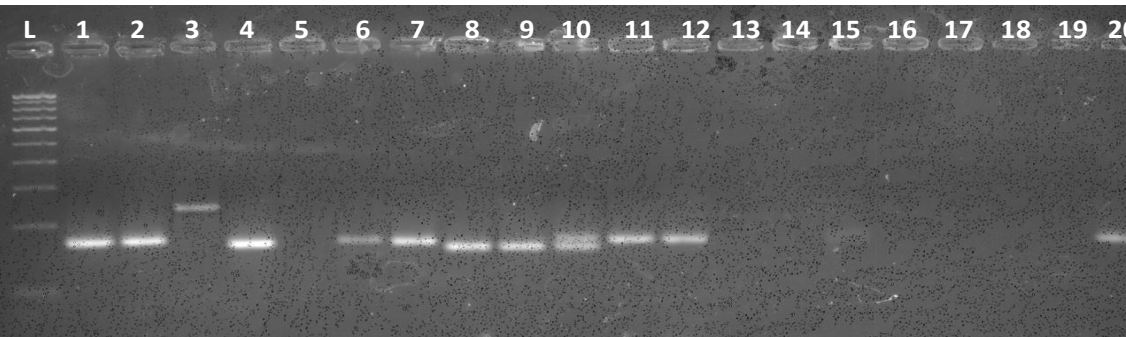

AH-SSR-V-23

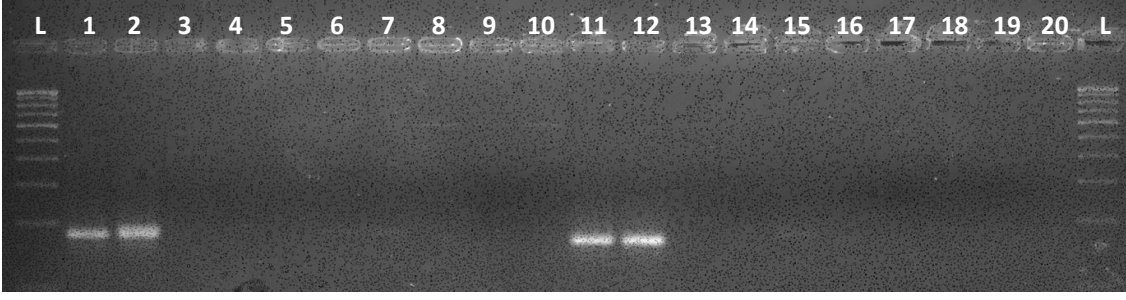

AH-SSR-V-25

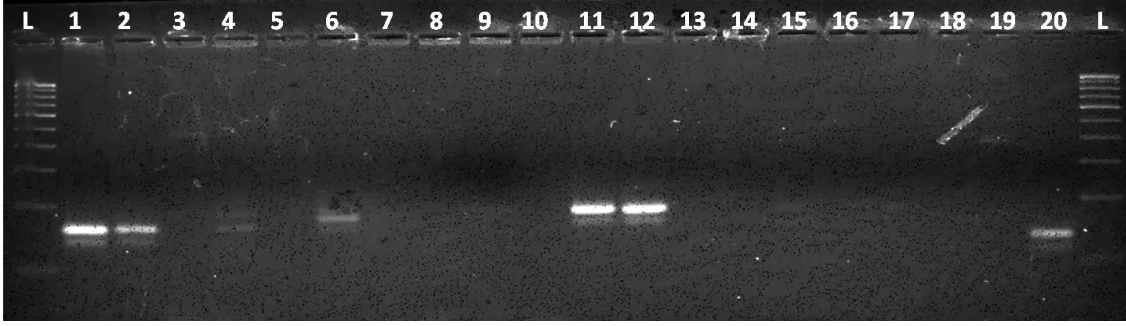

AH-SSR-V-26

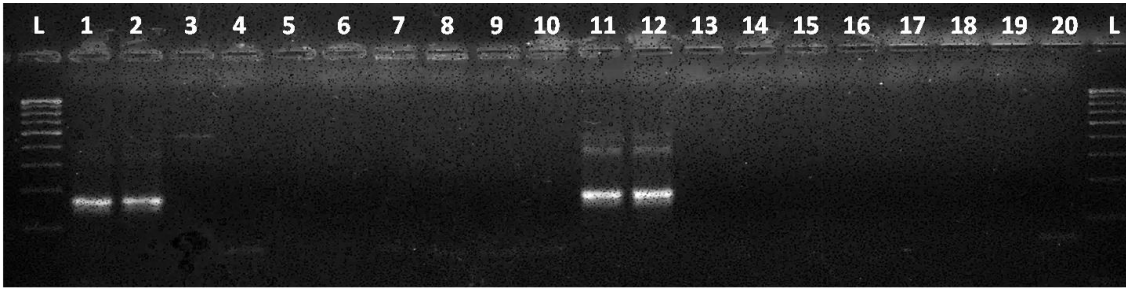

AH-SSR-V-27

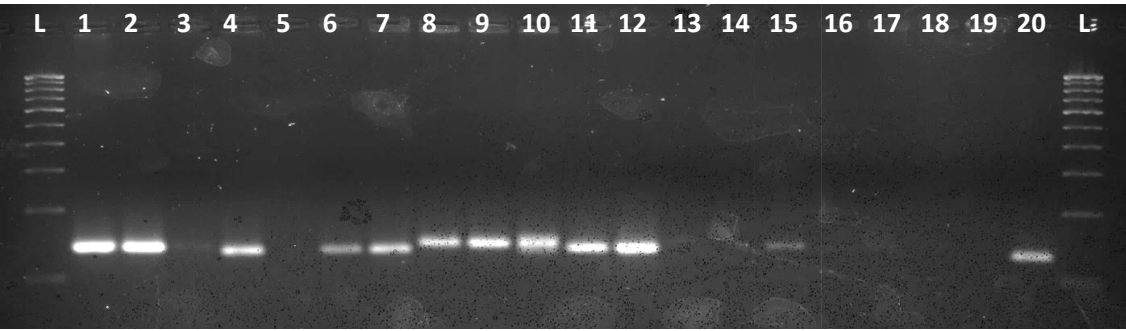

AH-SSR-V-28

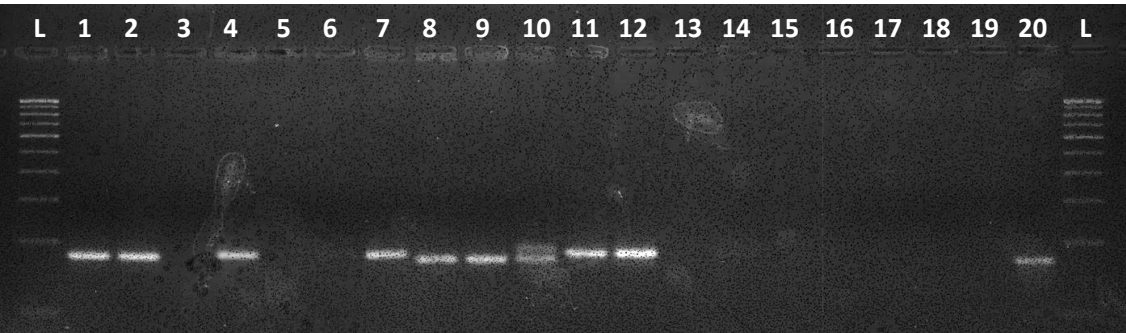

AH-SSR-V-29

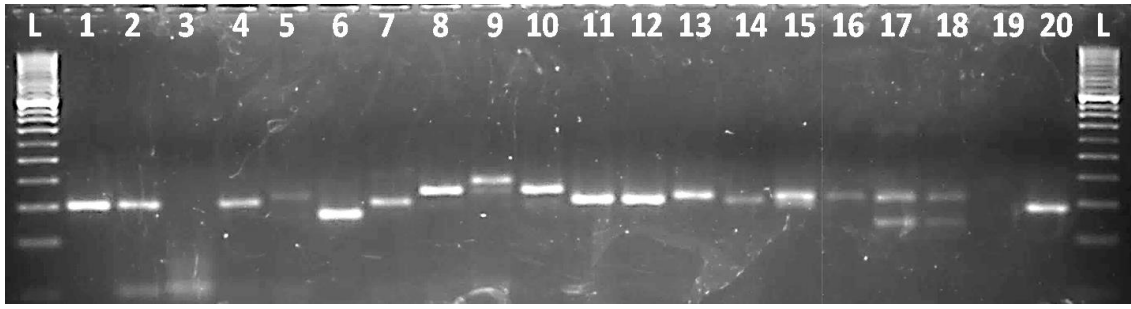

AH-SSR-V-30

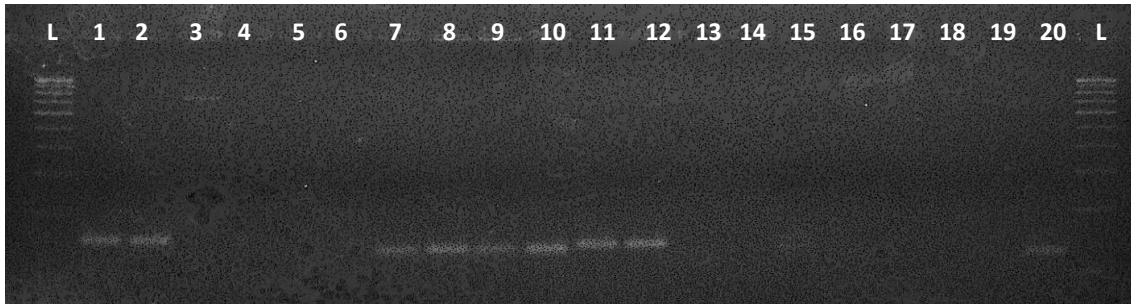

AH-SSR-V-32

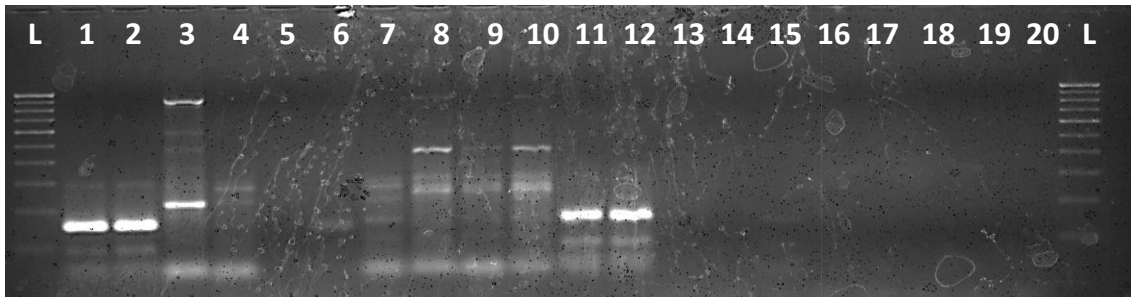

AH-SSR-V-37

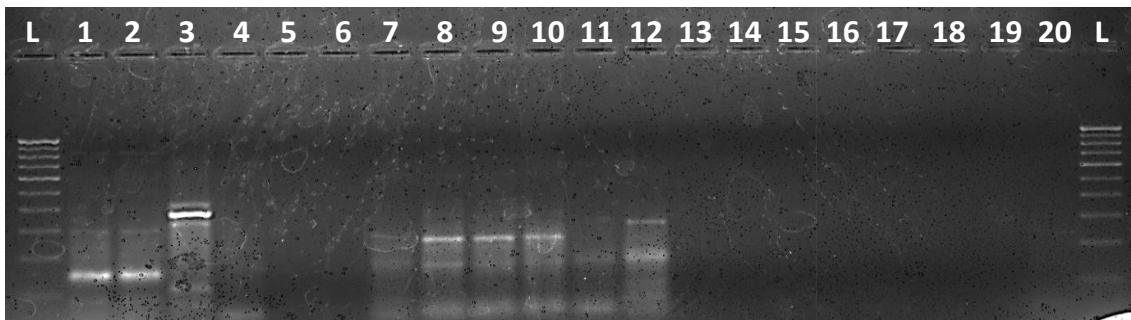

AH-SSR-V-43

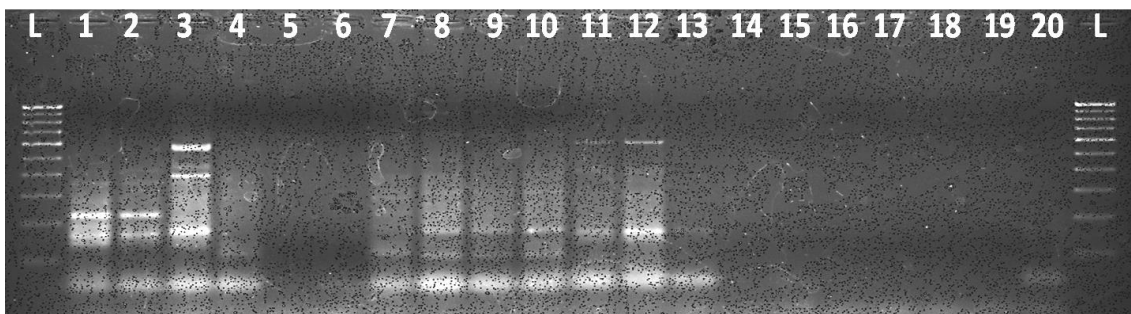

AH-SSR-V-44

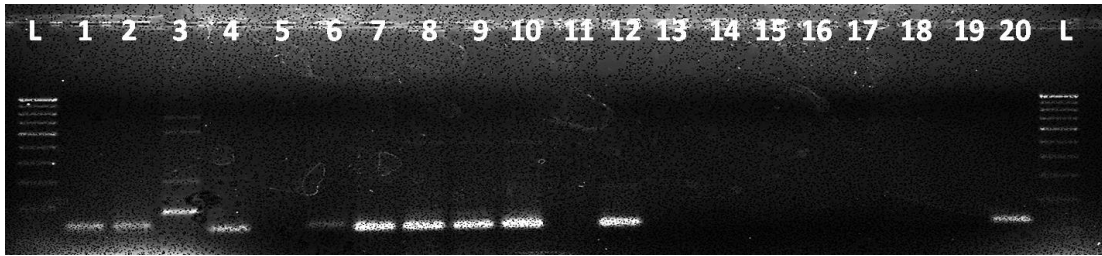

AH-SSR-V-53

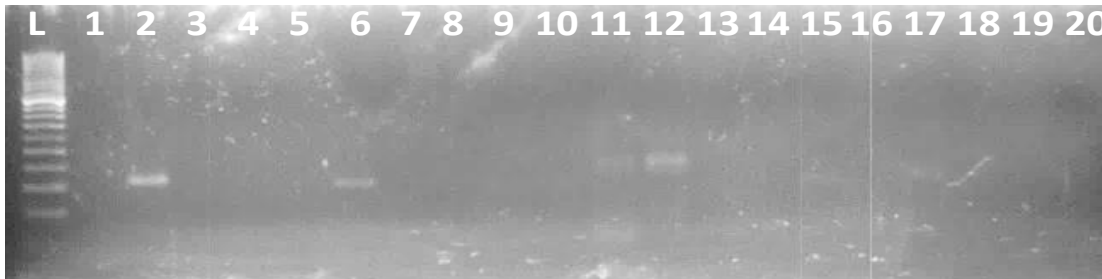

AH-SSR-V-58

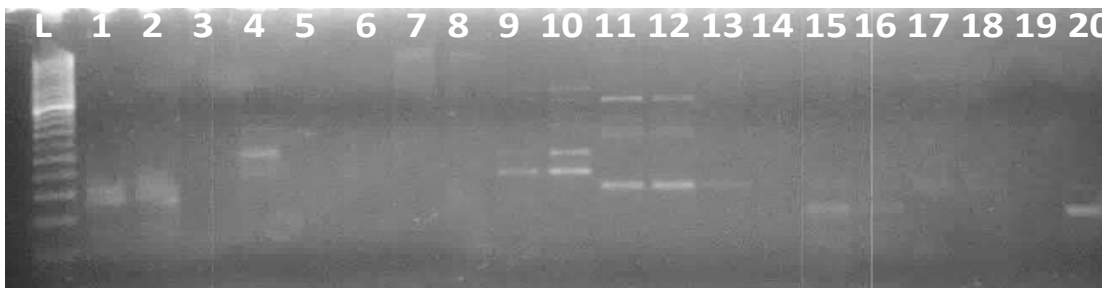

AH-SSR-V-61

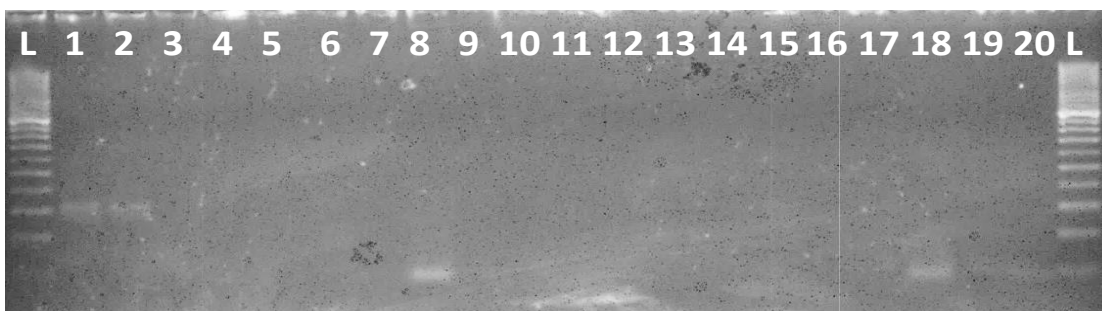

AH-SSR-V-62

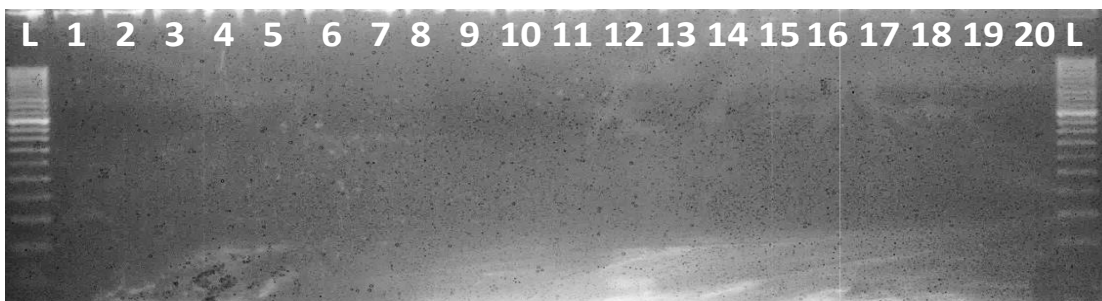

AH-SSR-V-63

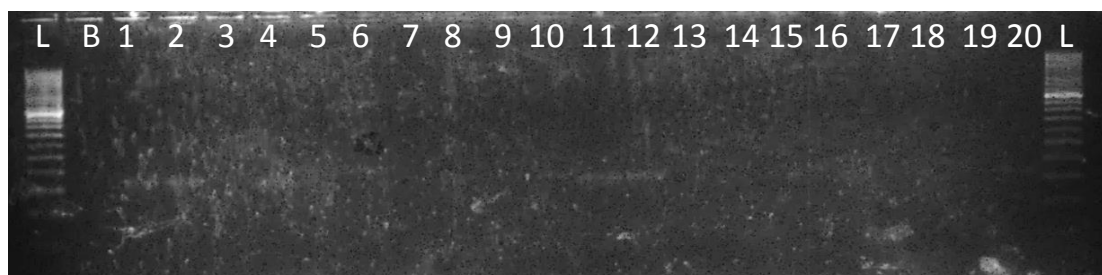

AH-SSR-V-64



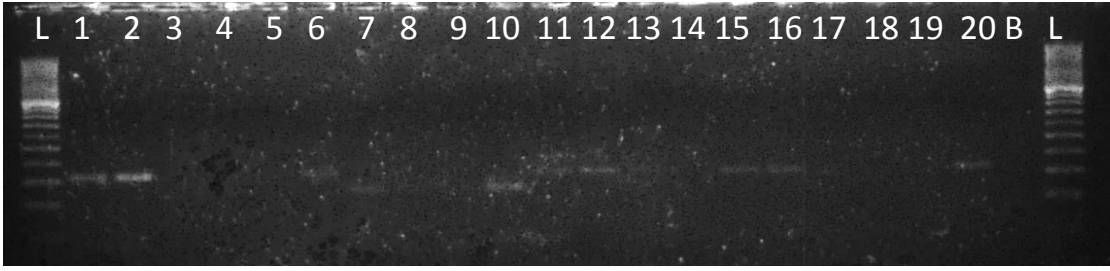

AH-SSR-V-67

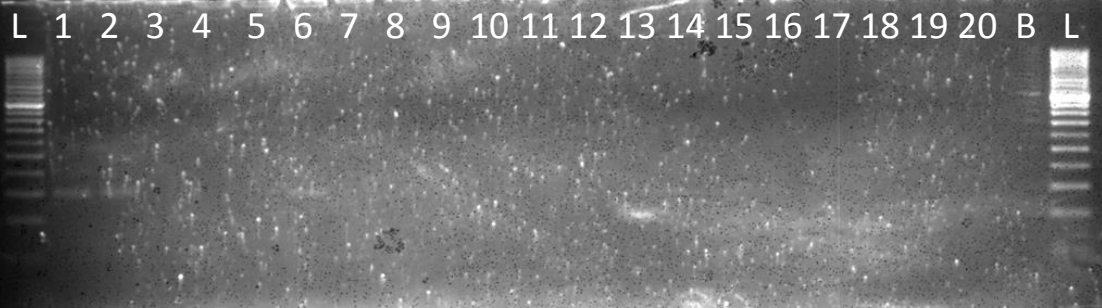

AH-SSR-V-68

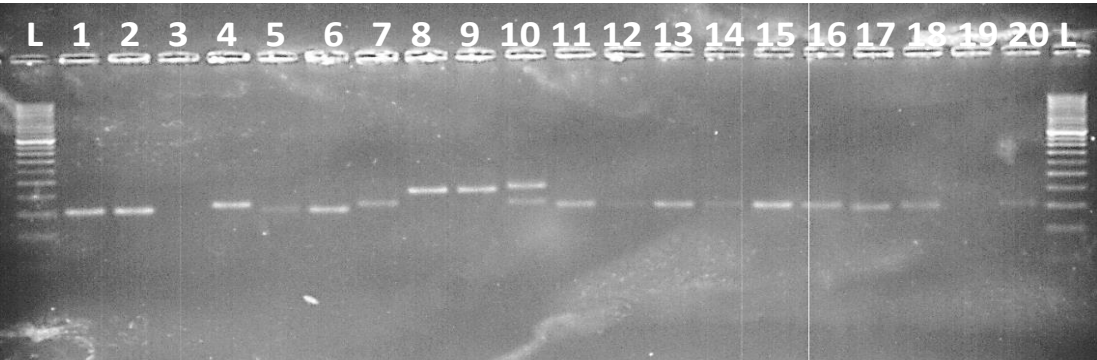

AH-SSR-V-70

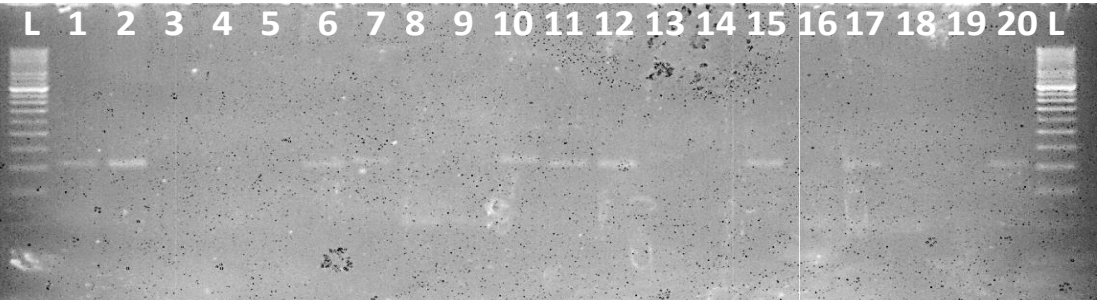

AH-SSR-V-87

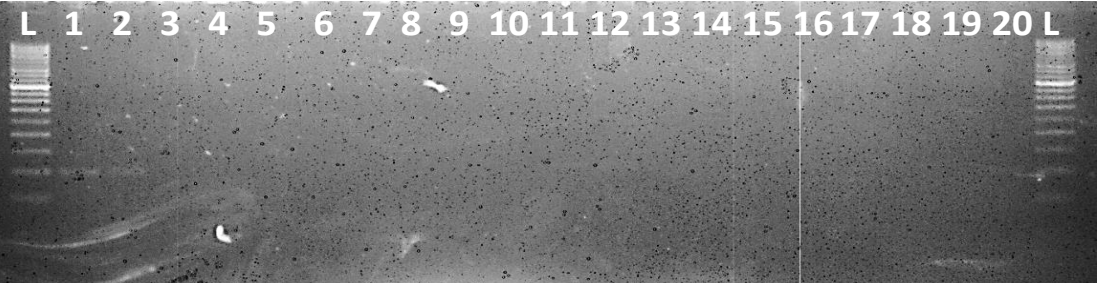

AH-SSR-V-92

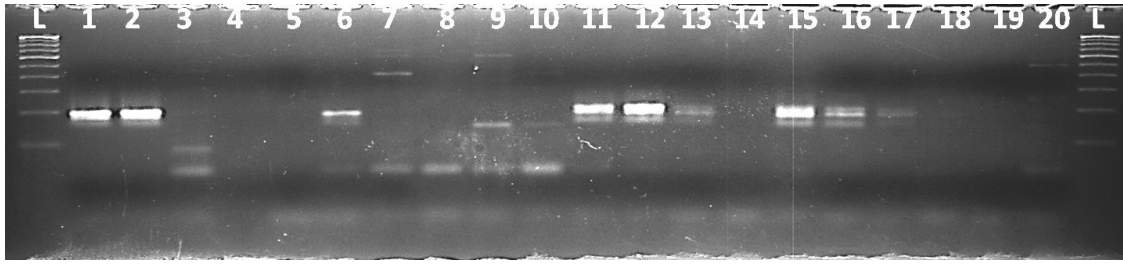

AH-SSR-V-118

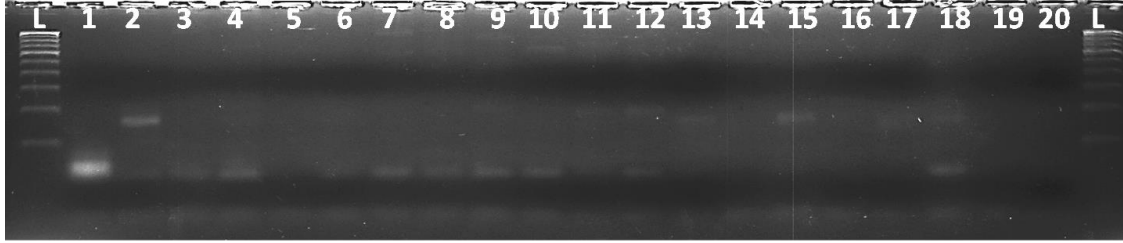

AH-SSR-V-119

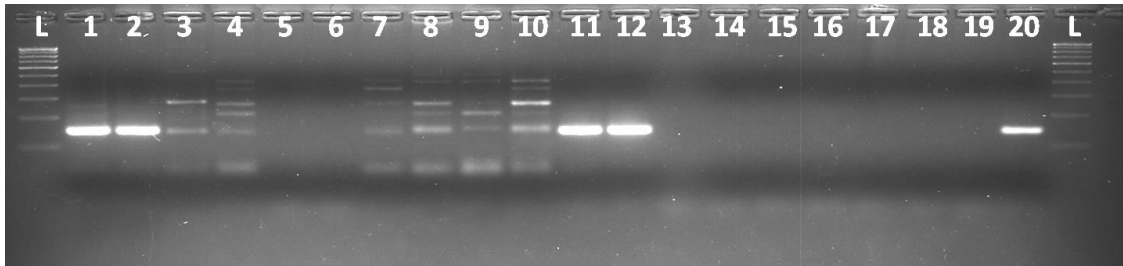

AH-SSR-V-121

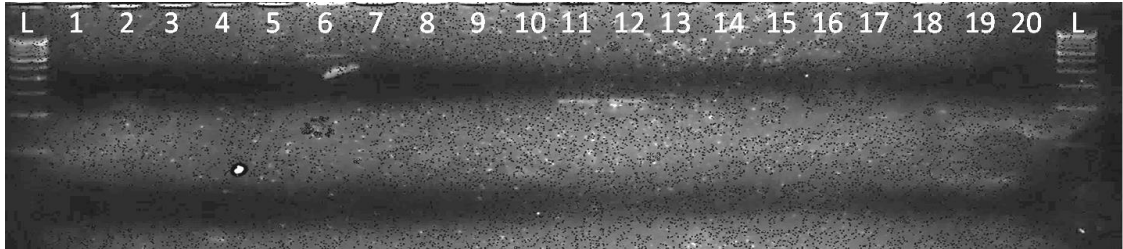

AH-SSR-V-135

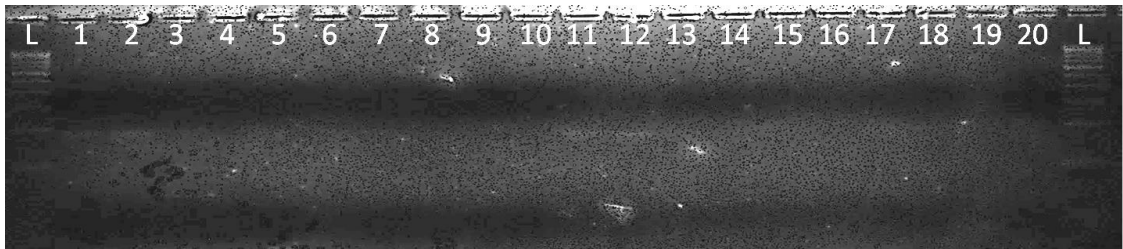

AH-SSR-V-138

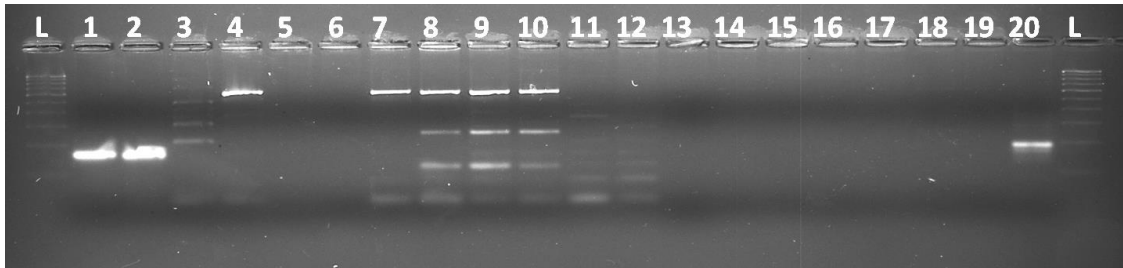

AH-SSR-V-140

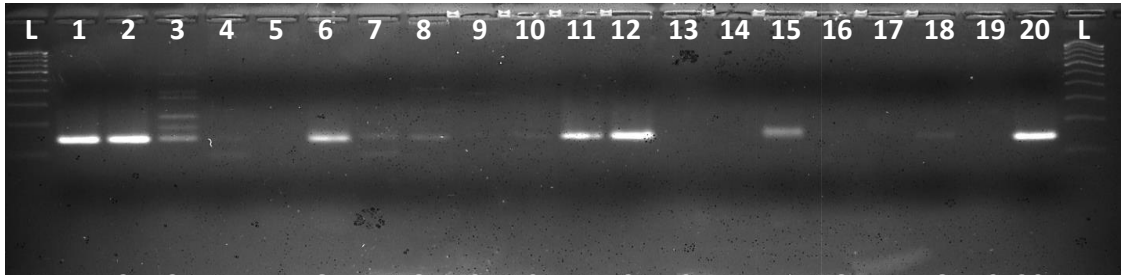

AH-SSR-V-142

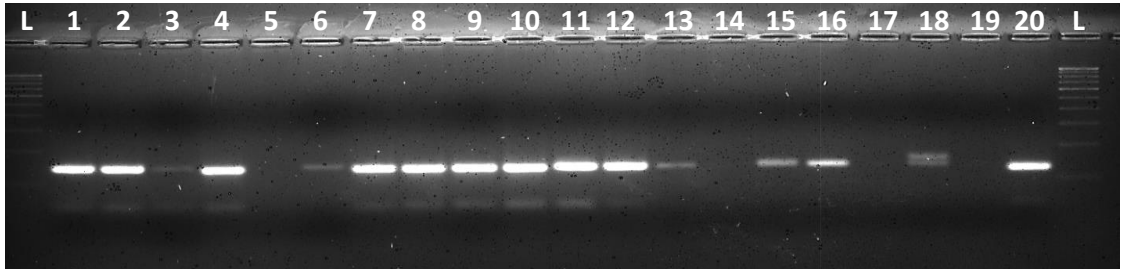

AH-SSR-V-152

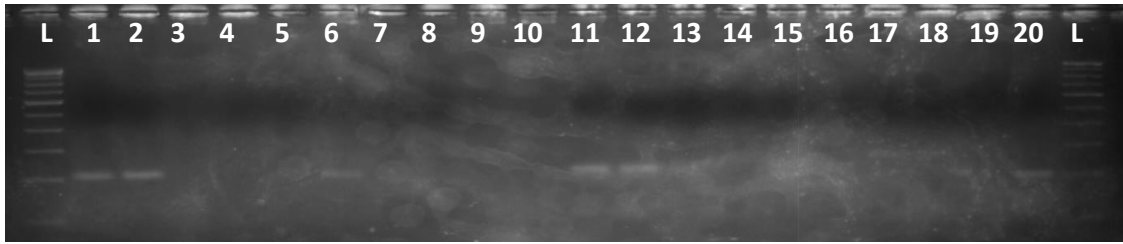

AH-SSR-V-159

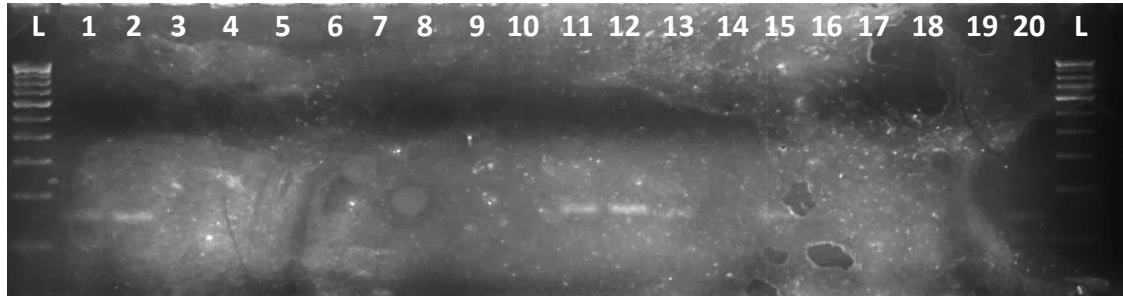

AH-SSR-V-161

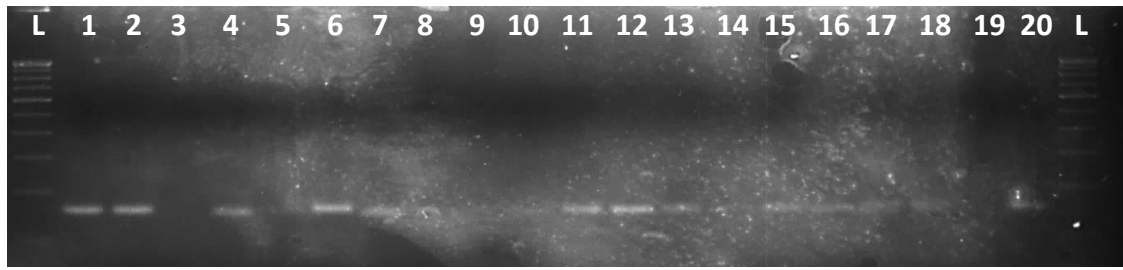

AH-SSR-V-162

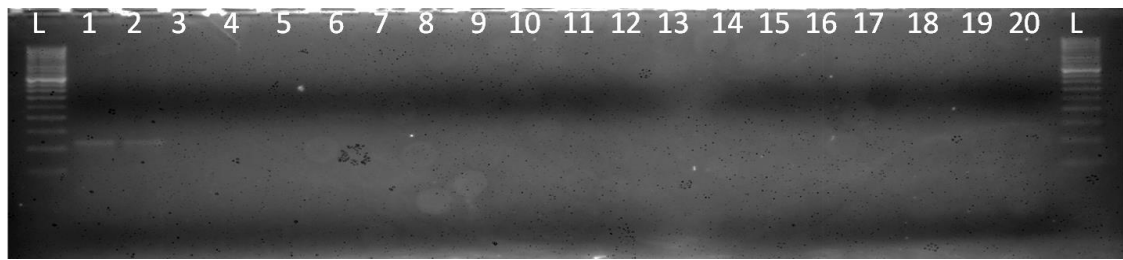

AH-SSR-V-168

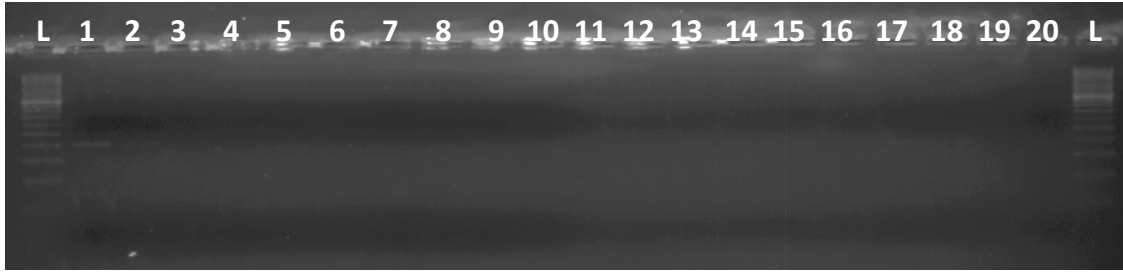

AH-SSR-V-178

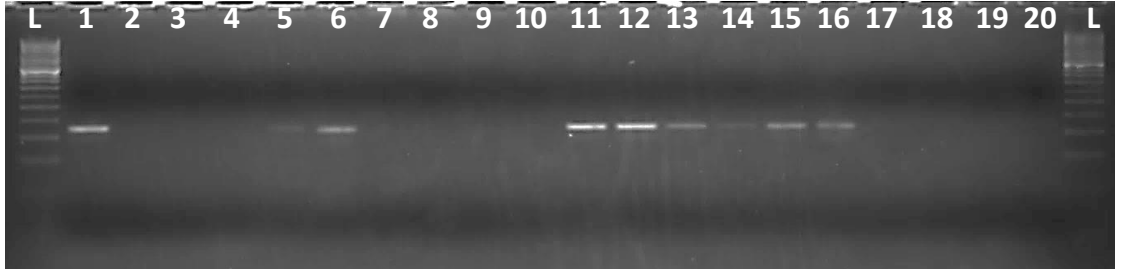

AH-SSR-V-179

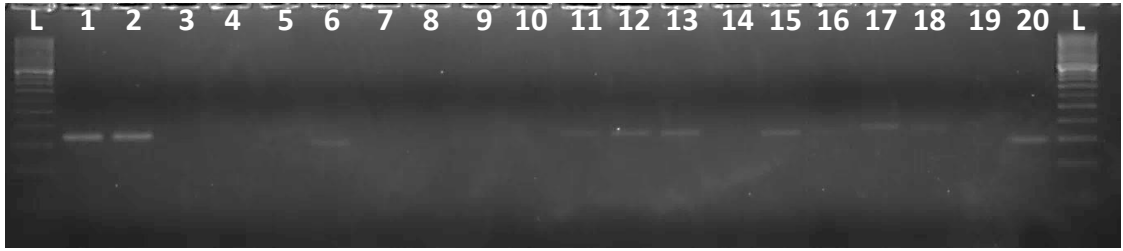

AH-SSR-V-180

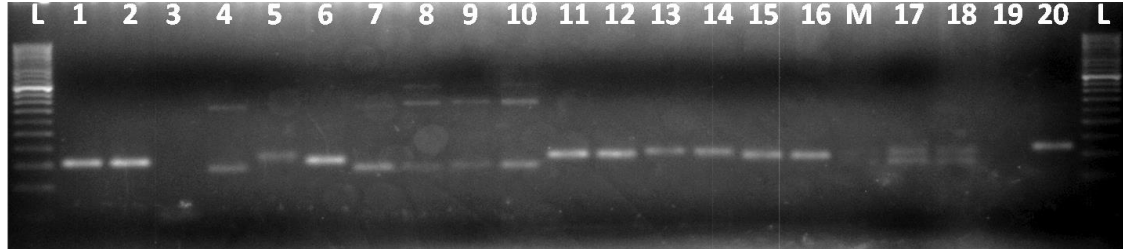

AH-SSR-V-184

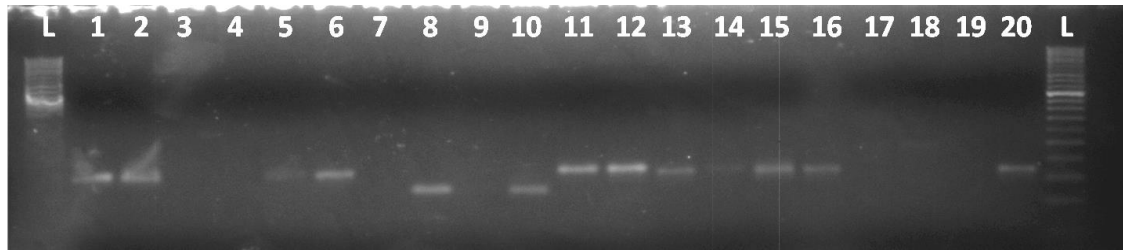

AH-SSR-V-185

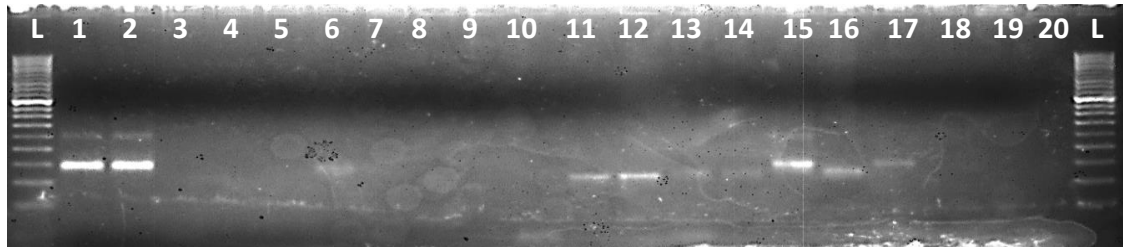

AH-SSR-V-186



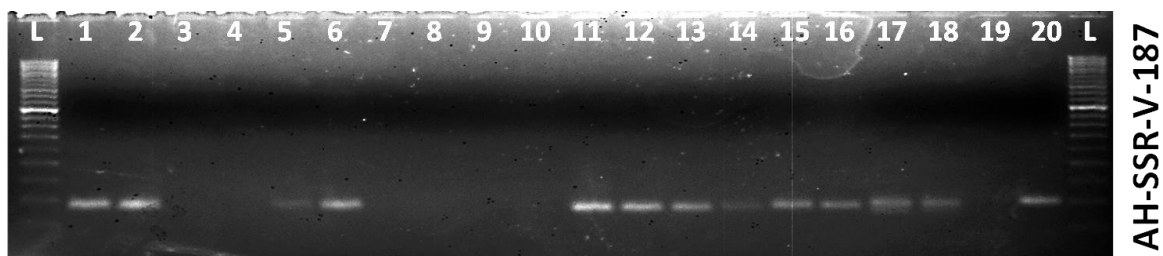

AH-SSR-V-187

### Supplementary File 7

#### Agarose gel images of 45 primers used in cross-transferability analysis

| Code | Genotype                   | Species                   |
|------|----------------------------|---------------------------|
| 1    | IC-38191                   | <i>A. hypochondriacus</i> |
| 2    | IC-38222                   | <i>A. hypochondriacus</i> |
| 3    | IC-469678                  | <i>A. hybridus</i>        |
| 4    | IC-469679                  | <i>A. hybridus</i>        |
| 5    | EC-198119                  | <i>A. cruentus</i>        |
| 6    | EC-198120                  | <i>A. cruentus</i>        |
| 7    | IC-536675                  | <i>A. tricolor</i>        |
| 8    | IC-536720                  | <i>A. lividus</i>         |
| 9    | IC-469735                  | <i>A. lividus</i>         |
| 10   | IC-541382                  | <i>A. lividus</i>         |
| 11   | IC-35672                   | <i>A. caudatus</i>        |
| 12   | IC-38181                   | <i>A. caudatus</i>        |
| 13   | IC-38219                   | <i>A. edulis</i>          |
| 14   | IC-381195                  | <i>A. edulis</i>          |
| 15   | NIC-22568                  | <i>A. viridis</i>         |
| 16   | NIC-22569                  | <i>A. viridis</i>         |
| 17   | IC-551458                  | <i>A. dubius</i>          |
| 18   | IC-551464                  | <i>A. dubius</i>          |
| 19   | NIC-22579                  | <i>A. spinosus</i>        |
| 20   | IC-258249                  | <i>A. retroflexus</i>     |
| L    | 50 bp or 100 bp DNA ladder |                           |
